# Supplementary material
Source: HighWire-hosted journal article supplement (http://www.qdcxjkg.com/highwire/filestream/113564/field_highwire_adjunct_files/0/Revised_online_supplemental_data_010311.pdf)
Supplement: Revised_online_supplemental_data_010311.pdf [file Revised_online_supplemental_data_010311.pdf]

**eTable 1. Comparison with the Cancer Registry data**

|                                    | <b>Hospital Database<br/>1982-2006<br/>5768 patients</b> |         | <b>Isère Cancer Registry<br/>1982-2005<br/>8590 patients</b> |         |
|------------------------------------|----------------------------------------------------------|---------|--------------------------------------------------------------|---------|
| <b>M/F %</b>                       | 85.5/14.5                                                |         | 85.5/14.5                                                    |         |
| <b>Median Age</b>                  | 63 years                                                 |         | 65 years                                                     |         |
| <b>Min -max</b>                    | 23-90                                                    |         | 18-101                                                       |         |
| <b>NSCLC n (%)</b>                 | 4837                                                     | (83.9%) | 7144                                                         | (83.2%) |
| <b>Adenocarcinoma</b>              | 1806                                                     | (31.3%) | 2559                                                         | (29.8%) |
| <b>Squamous cell carcinoma</b>     | 2331                                                     | (40.4%) | 3774                                                         | (43.9%) |
| <b>Undifferentiated large cell</b> | 448                                                      | (7.8%)  | 599                                                          | (7%)    |
| <b>Small Cell Carcinoma</b>        | 931                                                      | (16.1%) | 1446                                                         | (16.8%) |
| <b>Other types</b>                 | 252                                                      | (4.4%)  | 212                                                          | (2.5%)  |

**eTable 2: Causes of Death**

|                                 | <b>N</b> | <b>%</b> |
|---------------------------------|----------|----------|
| <b>Lung cancer</b>              | 578      | 88.2     |
| <b>Other cancer</b>             | 16       | 2.4      |
| <b>Intercurrent disease</b>     | 21       | 3.2      |
| <b>Iatrogenic complications</b> | 20       | 3.0      |
| <b>Multiple cancers*</b>        | 4        | 0.06     |
| <b>Unknown cause</b>            | 16       | 2.4      |
| <b>Total</b>                    | 655      |          |

\*Including lung adenocarcinoma

The exact cause of death is known for 97.6% of patients; in some cases Municipality registries were consulted to obtain the exact date of death.

**eFigure 1: Age of occurrence of adenocarcinoma by gender and smoking habit: (median age at diagnosis)**

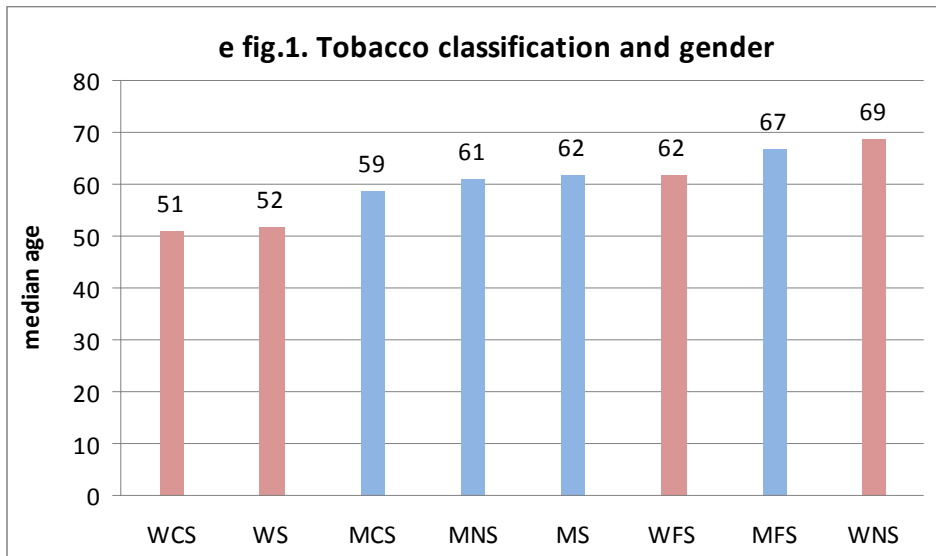

WCS: Women, Current Smoker

WS: Women, Smokers\*

MCS: Men, Current Smoker

MNS: Men, Never Smoker

\* Smokers = Current + Former + Undefined smokers

p = 0.6 (NS) MS vs MNS; p ≤ 0.001 WS vs WNS; p ≤ 0.001 WS vs MS

MS: Men, Smokers\*

WFS: Women, Former Smoker

MFS: Men, Former Smoker

WNS: Women, Never Smoker

**eFigure 2: Age at diagnosis according to smoking habit (Never smokers and Current smokers) and gender:**

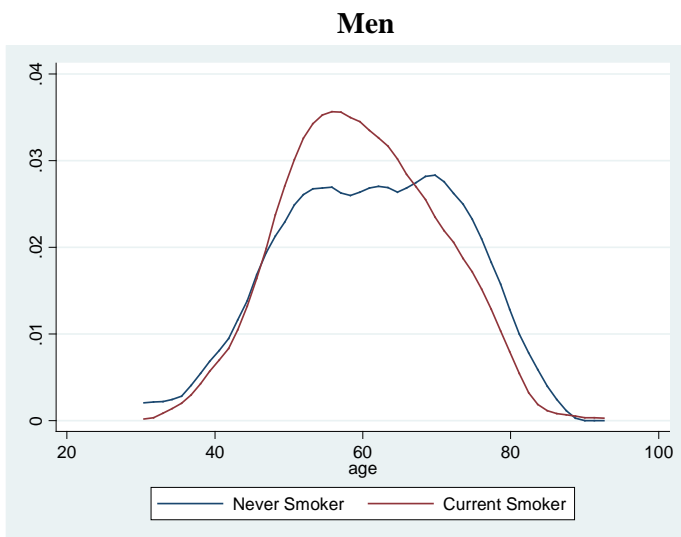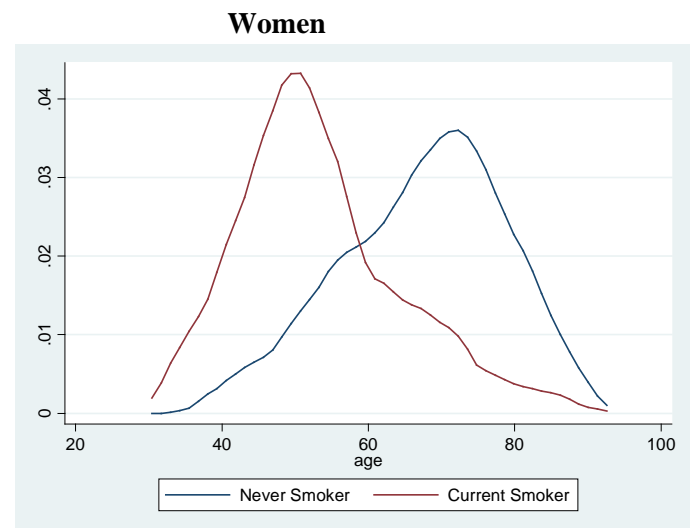

**eFigure 3: Proportion of never-smokers by age group and gender.**

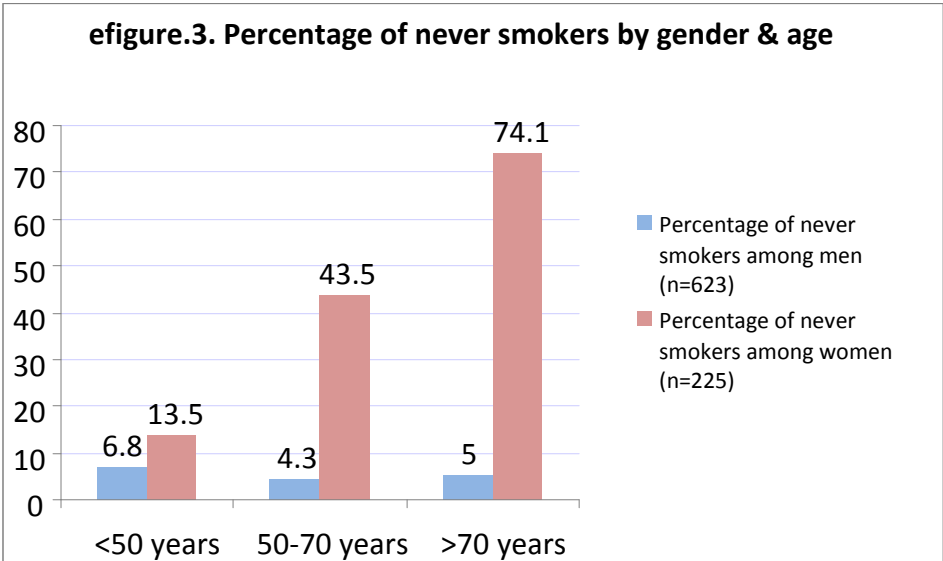

**eFigure 4: Changes in the population during the study period:**

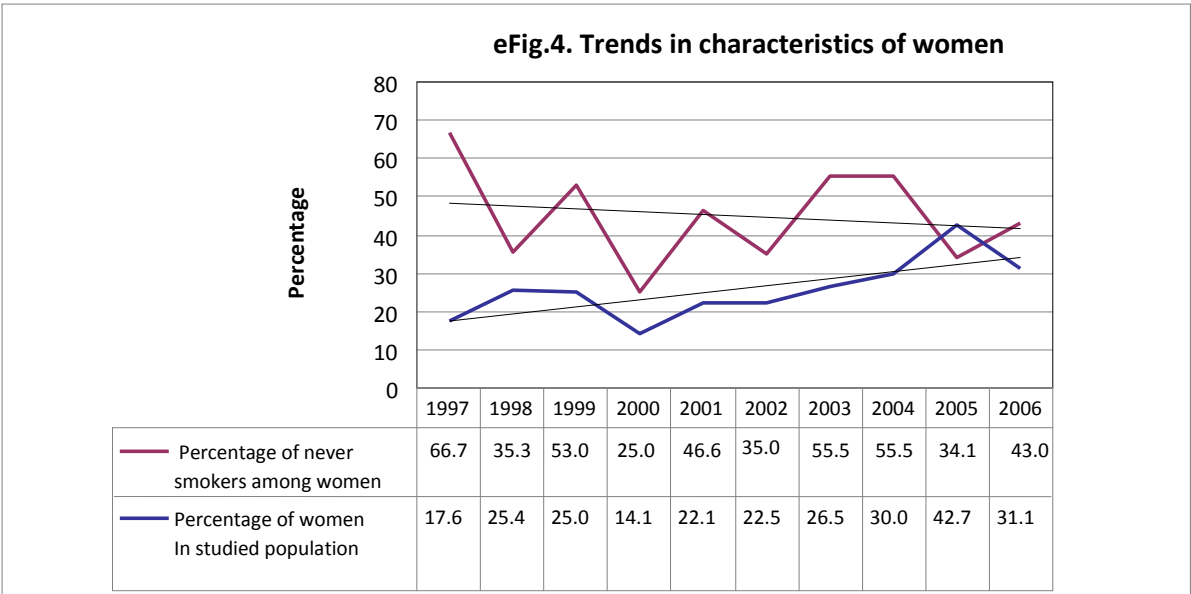

**eFigure 5: Survival by smoking habit in men**

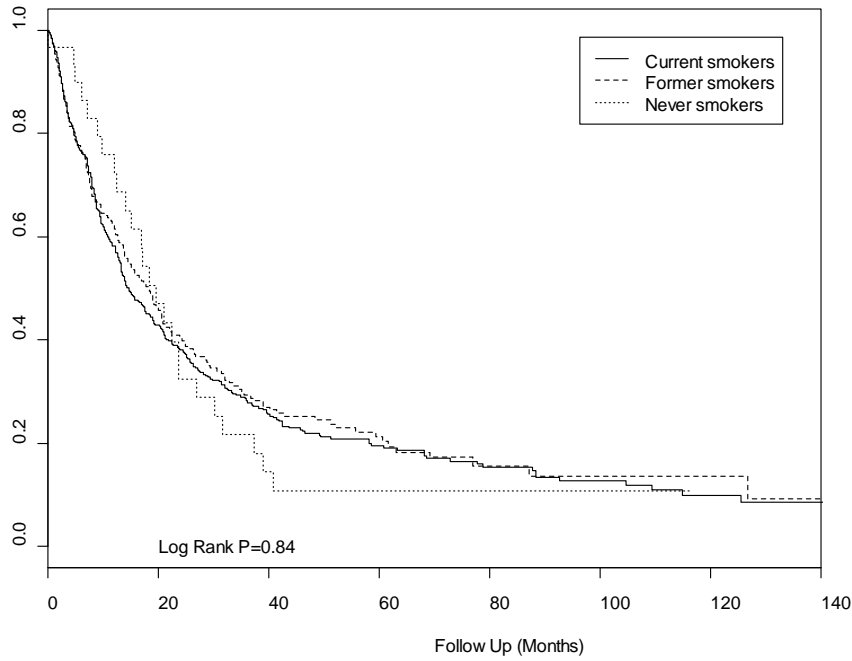

|                 | Number of subjects | Events           | Truncated       | Median survival CI <sub>95%</sub> |
|-----------------|--------------------|------------------|-----------------|-----------------------------------|
| Current smokers | <b>375</b>         | <b>79% (298)</b> | <b>21% (77)</b> | <b>14.3 [13.0-18.5]</b>           |
| Former smokers  | <b>196</b>         | <b>78% (153)</b> | <b>22% (43)</b> | <b>18.1 [13.8-21.4]</b>           |
| Never smokers   | <b>30</b>          | <b>83% (25)</b>  | <b>17% (5)</b>  | <b>19.5 [14.0-23.7]</b>           |

eFigure 6: Survival by smoking habit in women

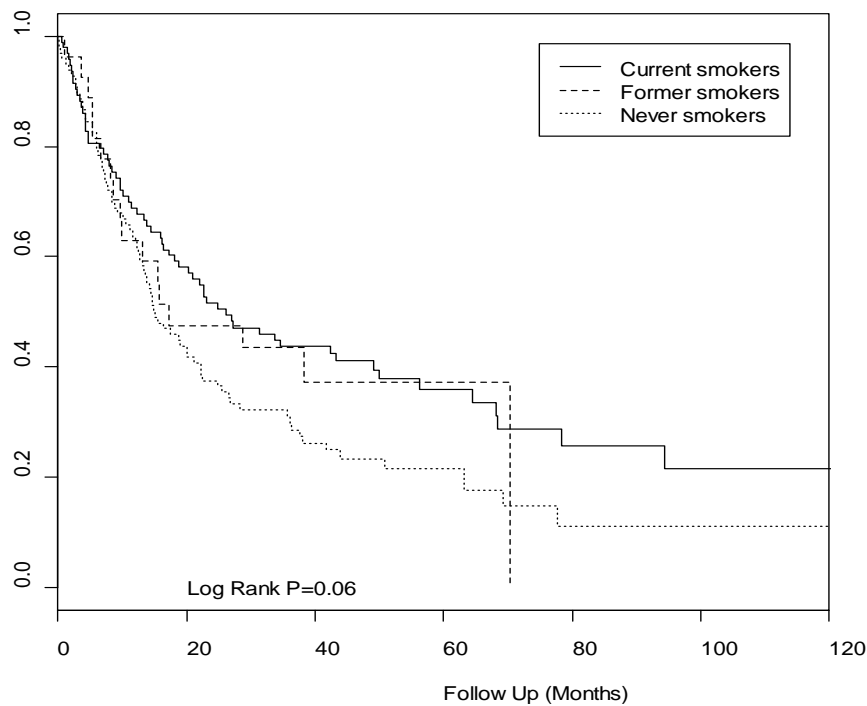

|                 | Number of subjects | Events   | Truncated | Median survival CI <sub>95%</sub> |
|-----------------|--------------------|----------|-----------|-----------------------------------|
| Current smokers | 94                 | 66% (62) | 34% (32)  | 26.2 [18.1-49.2]                  |
| Former smokers  | 27                 | 63% (17) | 37% (10)  | 17.3 [9.6-70.3]                   |
| Never smokers   | 100                | 77% (77) | 23% (23)  | 15.1 [12.8-22.2]                  |

eTable 3. Effect of smoking status on risk of death

|                          |                        | All (n=848)                  | Men (n=623)                 | Women (n=225)               |
|--------------------------|------------------------|------------------------------|-----------------------------|-----------------------------|
| <b>Cigarette smoking</b> | <b>Smokers</b>         | 1.12 [0.87 ; 1.43]<br>p=0.38 | 1.29 [0.85 ; 1.94]<br>p=0.2 | 0.87 [0.60 ; 1.27]<br>p=0.5 |
|                          | <b>Never Smokers</b>   | 1                            | 1                           | 1                           |
| <b>Cigarette smoking</b> | <b>Current Smokers</b> | 1.13 [0.88 ; 1.47]           | 1.29 [0.85 ; 1.96]          | 0.96 [0.62 ; 1.51]          |
|                          | <b>Former Smokers</b>  | 1.10 [0.83 ; 1.45]<br>p=0.6  | 1.27 [0.82 ; 1.97]<br>p=0.5 | 0.74 [0.43 ; 1.29]<br>p=0.6 |
|                          | <b>Never Smokers</b>   | 1                            | 1                           | 1                           |

Cox model with adjustment for Age, PS, tumour excision, clinical stage, sex.

**eTable 4. Clinical Model for death due to Lung Cancer**

| Parameter              |           | HR   | 95% CI |      | P <sup>s</sup> |
|------------------------|-----------|------|--------|------|----------------|
| <b>Age</b>             | ≥ 70      | 1.40 | 1.08   | 1.81 | 0.001          |
|                        | [60 ; 70] | 0.98 | 0.76   | 1.26 |                |
|                        | [50 ; 60] | 0.93 | 0.72   | 1.19 |                |
|                        | < 50      | 1    |        |      |                |
| <b>PS</b>              | 2,3,4     | 1.43 | 1.20   | 1.71 | <0.0001        |
|                        | 0,1       | 1    |        |      |                |
| <b>Tumour Excision</b> | Yes       | 0.43 | 0.34   | 0.54 | <0.0001        |
| <b>Clinical Stage</b>  | IV        | 3.5  | 2.6    | 4.5  | <0.0001        |
|                        | IIIA/IIIB | 2.3  | 1.8    | 3.0  |                |
|                        | IIA/IIB   | 2.03 | 1.37   | 3.01 |                |
|                        | IA/IB     | 1    |        |      |                |

<sup>s</sup> Fine & Gray Model with stepwise selection (all the variables excepting those concerning smoking relate to the initial presentation).

**eTable 5. Results adjusted on clinical risk factors and stratified by sex<sup>s</sup>**

|                          |                        | All (n=848)                 | Men (n=623)                 | Women(n=225)                |
|--------------------------|------------------------|-----------------------------|-----------------------------|-----------------------------|
| <b>Cigarette Smoking</b> | <b>Smokers</b>         | 1.13 [0.90 ; 1.42]<br>p=0.3 | 1.32 [0.85 ; 2.04]<br>p=0.2 | 0.89 [0.61 ; 1.31]<br>p=0.6 |
|                          | <b>Never Smokers</b>   | 1                           | 1                           | 1                           |
| <b>Cigarette Smoking</b> | <b>Current smokers</b> | 1.22 [0.96 ; 1.55]          | 1.38 [0.89 ; 2.14]          | 1.09 [0.69 ; 1.74]          |
|                          | <b>Former smokers</b>  | 1.01 [0.77 ; 1.31]<br>p=0.1 | 1.17 [0.74 ; 1.87]<br>p=0.2 | 0.65 [0.36 ; 1.16]<br>p=0.3 |
|                          | <b>Never smokers</b>   | 1                           | 1                           | 1                           |

<sup>s</sup> Fine & Gray Model Gray with adjustment for Age, PS, tumour excision, clinical stage, Gender.
